# Supplementary material for: Interactions of the Gasotransmitters Contribute to Microvascular Tone (Dys)regulation in the Preterm Neonate
Source: PubMed Central journal article supplement (PMC4373676; doi:10.1371/journal.pone.0121621), 2015-03-25
Supplement: pone.0121621.s001.pdf [file pone.0121621.s001.pdf]

## Supplementary Data

Alternate structural equation models are presented here.

As in the manuscript, the interaction between the three gasotransmitters and their individual and combined effects on microvascular blood flow were assessed. All models were manually constructed and presented here for our three input (NO, CO and H<sub>2</sub>S) and one output (microvascular blood flow) variables. These models were then tested and assessed for suitability by  $\chi^2$  Goodness of Fit and root mean square error of approximation (RMSEA). Lower  $\chi^2$  values represent a better predicted model, whilst an RMSEA of below 0.06 shows a good fit. RMSEA also allows for calculation of a confidence interval (CI) around the predictive model of the model.

For each model presented, the figure represents the overall interaction (males and females combined). Information regarding sex differences can be found in the tables below each figure. Results for  $\chi^2$  and RMSEA(CI) are presented in each table. Negative z values indicate an inverse correlation (or inhibitory effect) whilst positive z values indicate a positive correlation (stimulatory or permissive effect).

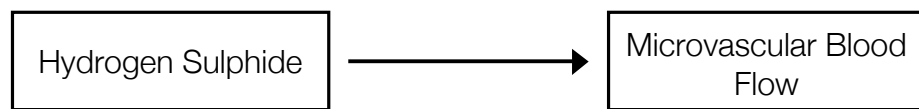

|                         | Female          | Male             | Overall          |
|-------------------------|-----------------|------------------|------------------|
| H <sub>2</sub> S → Flow | p=0.75 (z=0.31) | p=0.008 (z=2.67) | p=0.019 (z=2.34) |
| $\chi^2$                | <0.0001         | <0.0001          | <0.0001          |
| RMSEA                   | 0.00            | 0.00             | 0.00             |

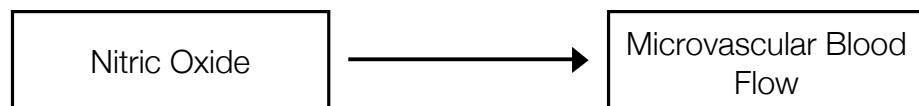

|           | Female           | Male            | Overall         |
|-----------|------------------|-----------------|-----------------|
| NO → Flow | p=0.99 (z=-0.01) | p=0.05 (z=1.99) | p=0.08 (z=1.78) |
| $\chi^2$  | <0.0001          | <0.0001         | <0.0001         |
| RMSEA     | 0.00             | 0.00            | 0.00            |

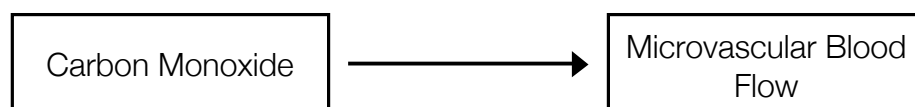

|           | Female          | Male            | Overall         |
|-----------|-----------------|-----------------|-----------------|
| CO → Flow | p=0.95 (z=0.06) | p=0.20 (z=1.28) | p=0.38 (z=0.89) |
| $\chi^2$  | <0.0001         | <0.0001         | <0.0001         |
| RMSEA     | 0.00            | 0.00            | 0.00            |

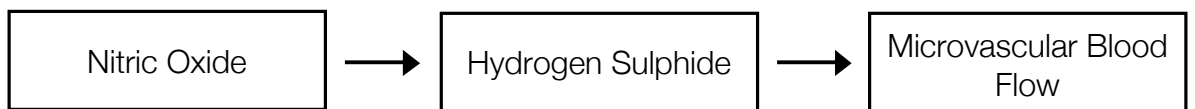

|                         | Female           | Male             | Overall          |
|-------------------------|------------------|------------------|------------------|
| NO → H <sub>2</sub> S   | p=0.004 (z=2.91) | p=0.06 (z=1.87)  | p=0.005 (z=2.82) |
| H <sub>2</sub> S → Flow | p=0.75 (z=0.31)  | p=0.008 (z=2.67) | p=0.02 (z=2.34)  |
| $\chi^2$                | 0.03             | 2.0              | 1.41             |
| RMSEA                   | 0.0 (0.0-0.21)   | 0.15 (0.0-0.45)  | 0.07 (0.0-0.3)   |

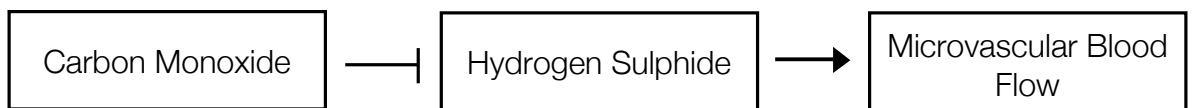

|                         | Female           | Male             | Overall          |
|-------------------------|------------------|------------------|------------------|
| CO → H <sub>2</sub> S   | p=0.13 (z=-1.51) | p=0.81 (z=-0.24) | p=0.39 (z=-0.86) |
| H <sub>2</sub> S → Flow | p=0.75 (z=0.31)  | p=0.008 (z=2.67) | p=0.02 (z=2.34)  |
| $\chi^2$                | 0.004            | 1.81             | 1.11             |
| RMSEA                   | 0.00             | 0.13 (0.00-0.44) | 0.04 (0.00-0.28) |

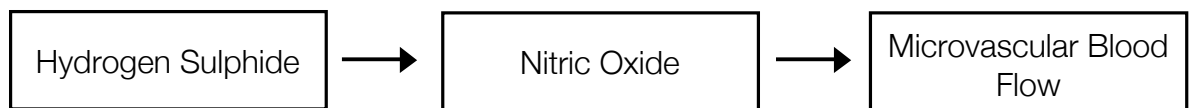

|                       | Female           | Male             | Overall          |
|-----------------------|------------------|------------------|------------------|
| H <sub>2</sub> S → NO | p=0.004 (z=2.91) | p=0.06 (z=1.87)  | p=0.005 (z=2.82) |
| NO → Flow             | p=0.98 (z=-0.01) | p=0.05 (z=1.99)  | p=0.08 (z=1.99)  |
| $\chi^2$              | 0.12             | 4.83             | 3.61             |
| RMSEA                 | 0.00 (0.00-0.29) | 0.29 (0.08-0.56) | 0.17 (0.00-0.37) |

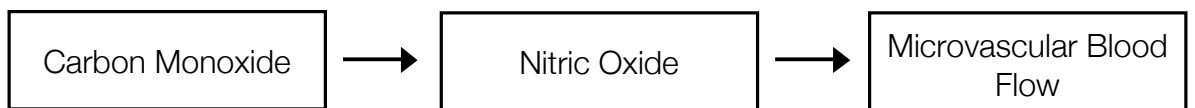

|           | Female           | Male             | Overall          |
|-----------|------------------|------------------|------------------|
| CO → NO   | p=0.22 (z=1.23)  | p=0.89 (z=0.14)  | p=0.34 (z=0.95)  |
| NO → Flow | p=0.99 (z=-0.01) | p=0.05 (z=1.99)  | p=0.08 (z=1.78)  |
| $\chi^2$  | <0.0001          | 1.56             | 0.56             |
| RMSEA     | 0.00             | 0.11 (0.00-0.42) | 0.00 (0.00-0.25) |



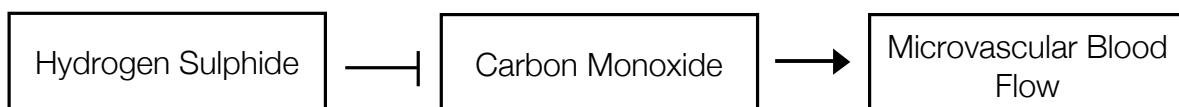

|                       | Female           | Male             | Overall          |
|-----------------------|------------------|------------------|------------------|
| H <sub>2</sub> S → CO | p=0.19 (z=-1.32) | p=0.87 (z=0.17)  | p=0.54 (z=-0.61) |
| CO → Flow             | p=0.83 (z=-0.21) | p=0.20 (z=1.29)  | p=0.51 (z=0.66)  |
| $\chi^2$              | 0.06             | 6.94             | 5.99             |
| RMSEA                 | 0.00 (0.00-0.25) | 0.36 (0.14-0.62) | 0.24 (0.08-0.43) |

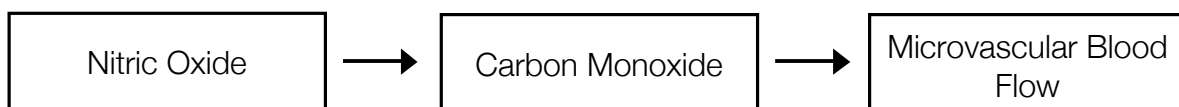

|           | Female           | Male             | Overall          |
|-----------|------------------|------------------|------------------|
| NO → CO   | p=0.22 (z=1.22)  | p=0.79 (z=0.26)  | p=0.32 (z=1.00)  |
| CO → Flow | p=0.98 (z=-0.02) | p=0.19 (z=1.30)  | p=0.35 (z=0.94)  |
| $\chi^2$  | <0.0001          | 3.77             | 2.82             |
| RMSEA     | 0.00             | 0.24 (0.00-0.52) | 0.14 (0.00-0.35) |

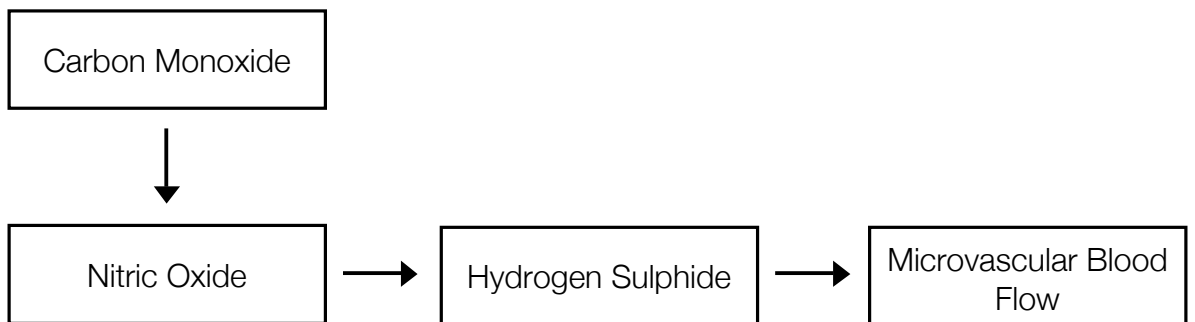

|                         | Female           | Male             | Overall          |
|-------------------------|------------------|------------------|------------------|
| CO → NO                 | p=0.22 (z=1.23)  | p=0.89 (z=0.14)  | p=0.34 (z=0.95)  |
| NO → H <sub>2</sub> S   | p=0.004 (z=2.91) | p=0.06 (z=1.87)  | p=0.005 (z=2.82) |
| H <sub>2</sub> S → Flow | p=0.75 (z=0.31)  | p=0.008 (z=2.67) | p=0.02 (z=2.34)  |
| $\chi^2$                | 7.39             | 3.84             | 4.03             |
| RMSEA                   | 0.18 (0.00-0.36) | 0.08 (0.00-0.27) | 0.06 (0.00-0.2)  |

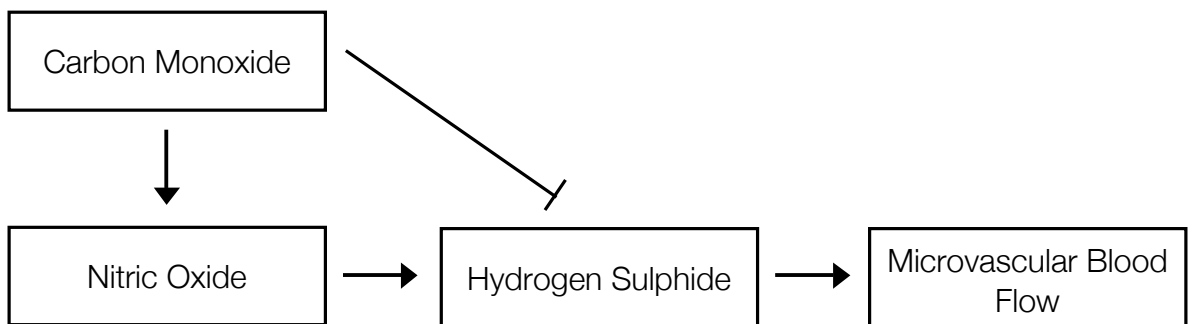

|                         | Female             | Male             | Overall          |
|-------------------------|--------------------|------------------|------------------|
| CO → NO                 | p=0.38 (z=0.89)    | p=0.87 (z=0.16)  | p=0.31 (z=1.02)  |
| CO → H <sub>2</sub> S   | p<0.0001 (z=-5.21) | p=0.75 (z=-0.31) | p=0.15 (z=-1.43) |
| NO → H <sub>2</sub> S   | p<0.0001 (z=4.46)  | p=0.06 (z=1.88)  | p=0.002 (z=3.06) |
| H <sub>2</sub> S → Flow | p=0.75 (z=0.31)    | p=0.008 (z=2.67) | p=0.02 (z=2.34)  |
| $\chi^2$                | 0.29               | 3.74             | 2.16             |
| RMSEA                   | 0.00 (0.00-0.16)   | 0.14 (0.00-0.35) | 0.03 (0.00-0.21) |

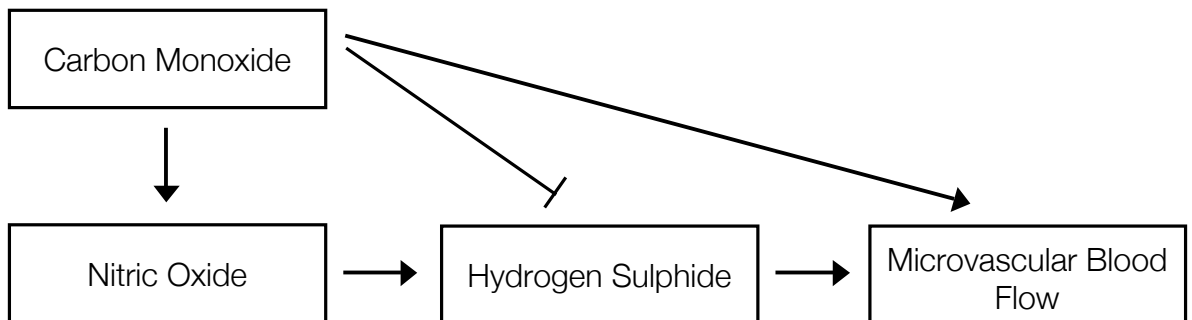

|                         | Female             | Male             | Overall          |
|-------------------------|--------------------|------------------|------------------|
| CO → NO                 | p=0.37 (z=0.89)    | p=0.77 (z=0.30)  | p=0.29 (z=1.06)  |
| CO → H <sub>2</sub> S   | p<0.0001 (z=-5.39) | p=0.84 (z=-0.20) | p=0.18 (z=-1.34) |
| CO → Flow               | p=0.60 (z=-0.52)   | p=0.16 (z=1.40)  | p=0.28 (z=1.08)  |
| NO → H <sub>2</sub> S   | p<0.0001 (z=4.53)  | p=0.06 (z=1.88)  | p=0.002 (z=3.05) |
| H <sub>2</sub> S → Flow | p=0.91 (z=-0.12)   | p=0.006 (z=2.74) | p=0.01 (z=2.52)  |
| $\chi^2$                | 0.03               | 1.88             | 1.02             |
| RMSEA                   | 0.00 (0.00-0.21)   | 0.14 (0.00-0.44) | 0.02 (0.00-0.28) |

This is the model presented in the manuscript and is included here for ease of comparison

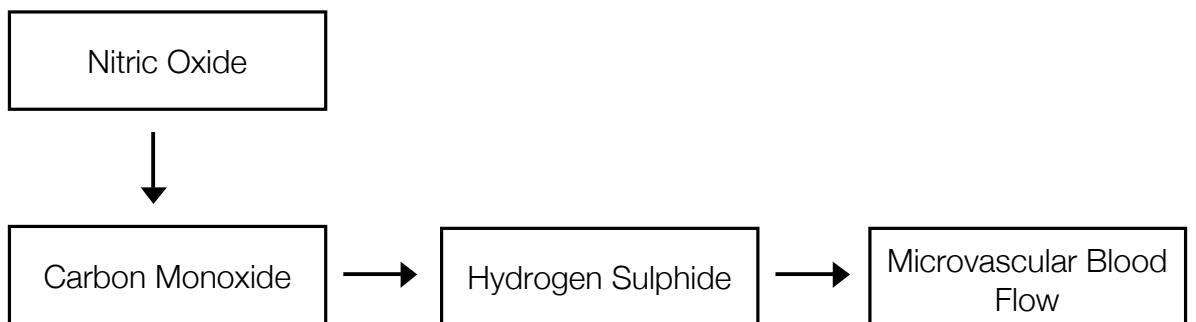

|                         | Female           | Male             | Overall          |
|-------------------------|------------------|------------------|------------------|
| NO → CO                 | p=0.38 (z=0.89)  | p=0.89 (z=0.14)  | p=0.35 (z=0.93)  |
| CO → H <sub>2</sub> S   | p=0.30 (z=1.05)  | p=0.81 (z=-0.24) | p=0.41 (z=-0.82) |
| H <sub>2</sub> S → Flow | p=0.75 (z=0.31)  | p=0.008 (z=2.67) | p=0.02 (z=2.34)  |
| $\chi^2$                | 14.19            | 7.16             | 10.99            |
| RMSEA                   | 0.30 (0.15-0.46) | 0.17 (0.00-0.34) | 0.17 (0.07-0.29) |

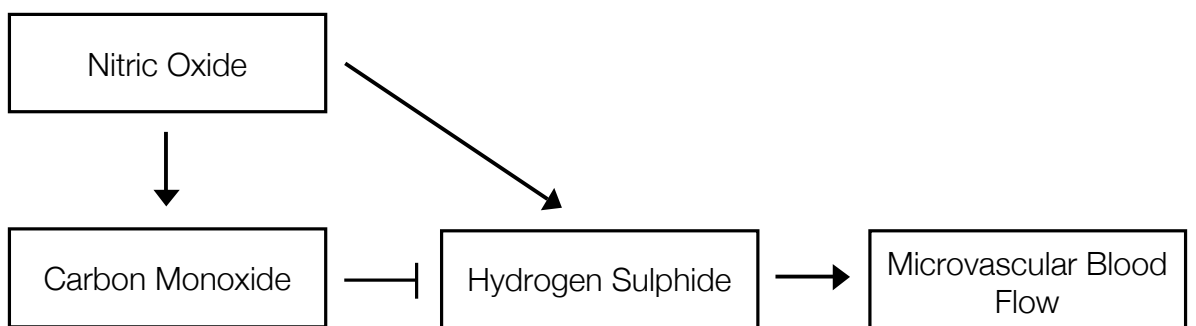

|                         | Female             | Male             | Overall          |
|-------------------------|--------------------|------------------|------------------|
| NO → CO                 | p=0.36 (z=0.92)    | p=0.87 (z=0.16)  | p=0.31 (z=1.02)  |
| NO → H <sub>2</sub> S   | p<0.0001 (z=4.46)  | p=0.06 (z=1.88)  | p=0.002 (z=3.06) |
| CO → H <sub>2</sub> S   | p<0.0001 (z=-5.21) | p=0.75 (z=-0.31) | p=0.15 (z=-1.43) |
| H <sub>2</sub> S → Flow | p=0.75 (z=0.31)    | p=0.008 (z=2.67) | p=0.02 (z=2.34)  |
| $\chi^2$                | 0.29               | 3.74             | 2.16             |
| RMSEA                   | 0.00 (0.00-0.16)   | 0.14 (0.00-0.35) | 0.03 (0.00-0.21) |

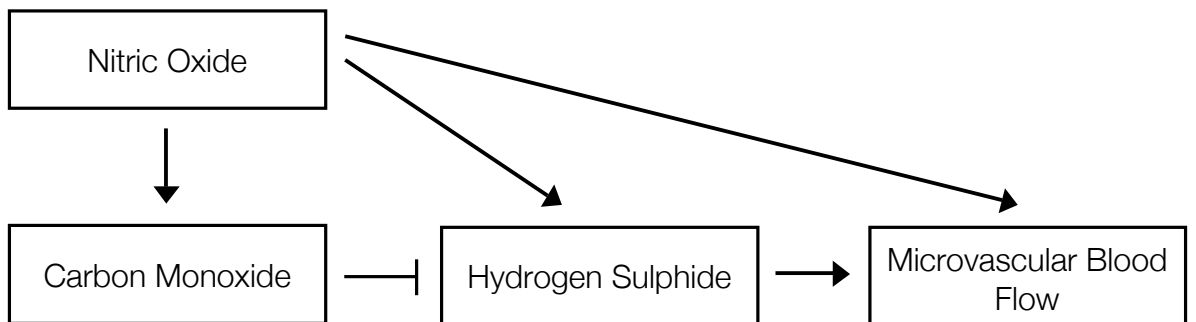

|                         | Female             | Male             | Overall          |
|-------------------------|--------------------|------------------|------------------|
| NO → CO                 | p=0.36 (z=0.92)    | p=0.87 (z=0.16)  | p=0.31 (z=1.02)  |
| NO → H <sub>2</sub> S   | p<0.0001 (z=4.46)  | p=0.06 (z=1.88)  | p=0.002 (z=3.06) |
| NO → Flow               | p=0.87 (z=-0.16)   | p=0.15 (z=1.43)  | p=0.23 (z=1.19)  |
| CO → H <sub>2</sub> S   | p<0.0001 (z=-5.21) | p=0.75 (z=-0.31) | p=0.15 (z=-1.43) |
| H <sub>2</sub> S → Flow | p=0.73 (z=0.35)    | p=0.02 (z=2.26)  | p=0.06 (z=1.92)  |
| $\chi^2$                | 0.27               | 1.75             | 1.75             |
| RMSEA                   | 0.27 (0.00-0.32)   | 0.13 (0.00-0.43) | 0.00 (0.00-0.26) |



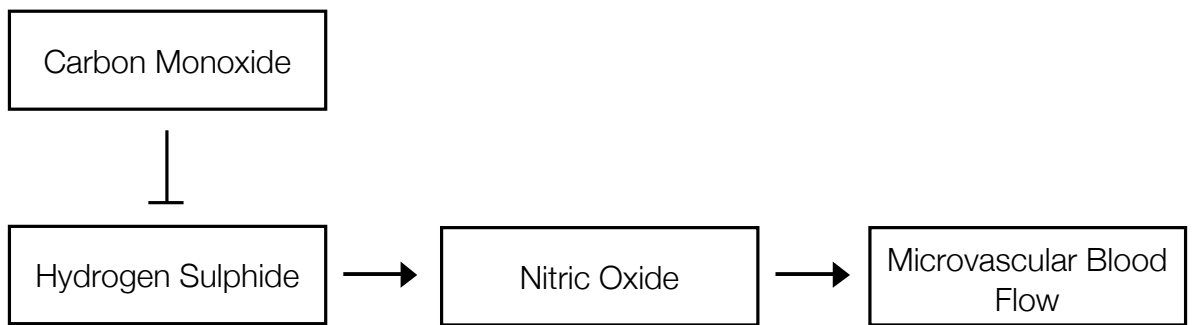

|                       | Female           | Male             | Overall          |
|-----------------------|------------------|------------------|------------------|
| CO → H <sub>2</sub> S | p=0.31 (z=-1.51) | p=0.81 (z=-0.24) | p=0.39 (z=-0.86) |
| H <sub>2</sub> S → NO | p=0.004 (z=2.91) | p=0.06 (z=1.87)  | p=0.005 (z=2.82) |
| NO → Flow             | p=0.99 (z=-0.01) | p=0.05 (z=1.99)  | p=0.08 (z=1.78)  |
| $\chi^2$              | 7.30             | 6.64             | 6.42             |
| RMSEA                 | 0.18 (0.00-0.36) | 0.16 (0.00-0.34) | 0.11 (0.00-0.24) |

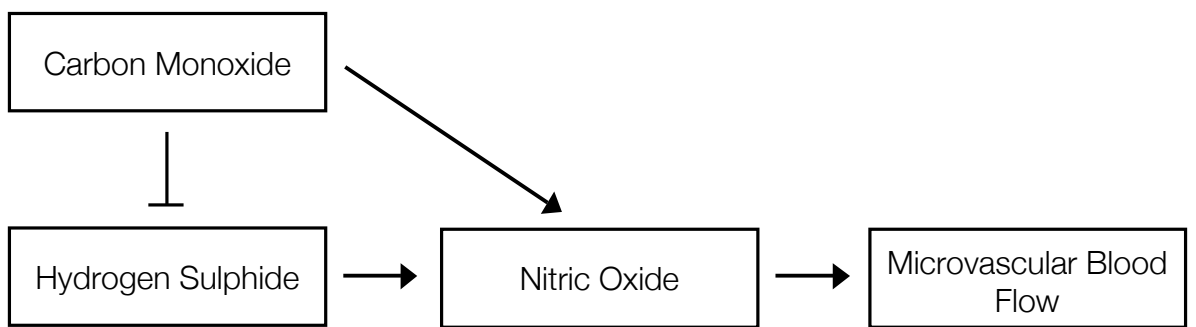

|                       | Female             | Male             | Overall          |
|-----------------------|--------------------|------------------|------------------|
| CO → H <sub>2</sub> S | p<0.0001 (z=-3.69) | p=0.78 (z=-0.27) | p=0.25 (z=-1.16) |
| CO → NO               | p=0.002 (z=3.10)   | p=0.81 (0.25)    | p=0.15 (z=1.45)  |
| H <sub>2</sub> S → NO | p<0.0001 (z=3.52)  | p=0.06 (z=1.88)  | p=0.003 (z=3.02) |
| NO → Flow             | p=0.99 (z=-0.01)   | p=0.05 (z=1.99)  | p=0.08 (z=1.78)  |
| $\chi^2$              | 0.39               | 6.58             | 4.37             |
| RMSEA                 | 0.00 (0.00-0.18)   | 0.22 (0.05-0.42) | 0.12 (0.00-0.26) |

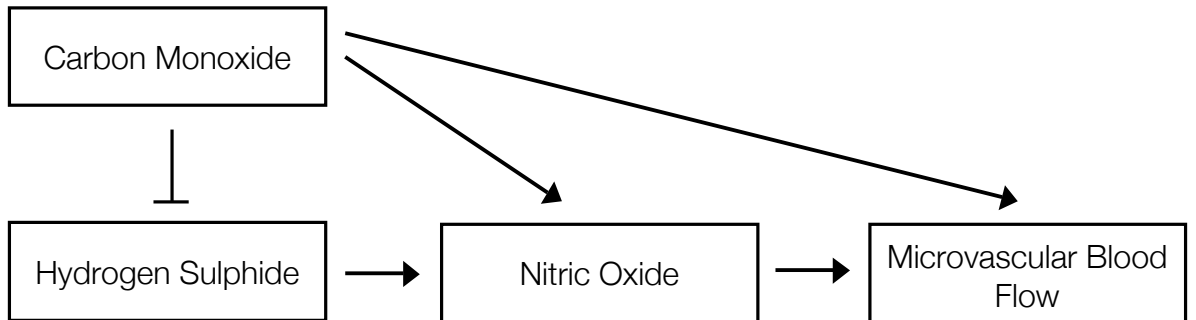

|                       | Female             | Male             | Overall          |
|-----------------------|--------------------|------------------|------------------|
| CO → H <sub>2</sub> S | p<0.0001 (z=-3.78) | p=0.87 (z=0.16)  | p=0.32 (z=-0.99) |
| CO → NO               | p=0.001 (z=3.18)   | p=0.88 (z=0.15)  | p=0.16 (z=1.39)  |
| CO → Flow             | p=0.55 (z=-0.60)   | p=0.20 (z=1.28)  | p=0.74 (z=0.33)  |
| H <sub>2</sub> S → NO | p<0.0001 (z=3.58)  | p=0.06 (z=1.86)  | p=0.003 (z=2.98) |
| NO → Flow             | p=0.97 (z=0.04)    | p=0.05 (z=1.98)  | p=0.09 (z=1.72)  |
| $\chi^2$              | 0.04               | 5.10             | 4.26             |
| RMSEA                 | 0.00 (0.00-0.23)   | 0.30 (0.09-0.57) | 0.19 (0.04-0.39) |

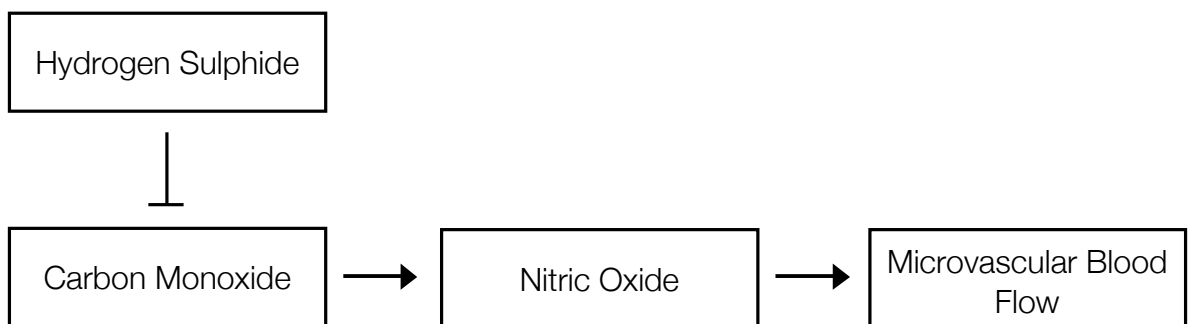

|                       | Female           | Male             | Overall          |
|-----------------------|------------------|------------------|------------------|
| $H_2S \rightarrow CO$ | p=0.34 (z=-0.96) | p=0.81 (z=-0.24) | p=0.41 (z=-0.82) |
| $CO \rightarrow NO$   | p=0.39 (z=0.86)  | p=0.89 (z=0.14)  | p=0.36 (z=0.92)  |
| $NO \rightarrow Flow$ | p=0.99 (z=-0.01) | p=0.05 (z=1.99)  | p=0.08 (z=1.78)  |
| $\chi^2$              | 14.29            | 10.00            | 13.20            |
| RMSEA                 | 0.30 (0.15-0.46) | 0.22 (0.08-0.38) | 0.19 (0.10-0.31) |

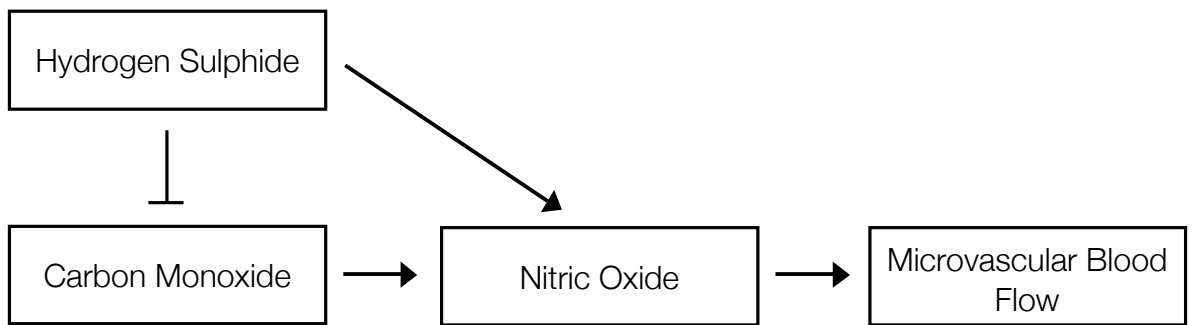

|                       | Female                  | Male                   | Overall                |
|-----------------------|-------------------------|------------------------|------------------------|
| $H_2S \rightarrow CO$ | $p=0.02$ ( $z=-2.35$ )  | $p=0.78$ ( $z=-0.27$ ) | $p=0.26$ ( $z=-1.12$ ) |
| $H_2S \rightarrow NO$ | $p<0.0001$ ( $z=3.52$ ) | $p=0.06$ ( $z=1.88$ )  | $p=0.003$ ( $z=3.02$ ) |
| $CO \rightarrow NO$   | $p=0.002$ ( $z=3.10$ )  | $p=0.81$ ( $z=0.25$ )  | $p=0.15$ ( $z=1.45$ )  |
| $NO \rightarrow Flow$ | $p=0.99$ ( $z=-0.01$ )  | $p=0.05$ ( $z=1.99$ )  | $p=0.08$ ( $z=1.78$ )  |
| $\chi^2$              | 0.39                    | 6.58                   | 4.37                   |
| RMSEA                 | 0.00 (0.00-0.18)        | 0.22 (0.05-0.42)       | 0.12 (0.00-0.26)       |

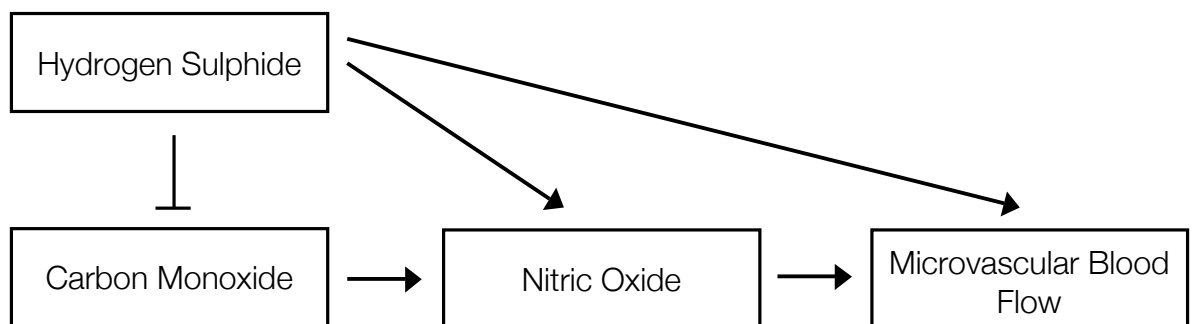

|                         | Female                  | Male                   | Overall                |
|-------------------------|-------------------------|------------------------|------------------------|
| $H_2S \rightarrow CO$   | $p=0.02$ ( $z=-2.35$ )  | $p=0.78$ ( $z=-0.27$ ) | $p=0.26$ ( $z=-1.12$ ) |
| $H_2S \rightarrow NO$   | $p<0.0001$ ( $z=3.52$ ) | $p=0.06$ ( $z=1.88$ )  | $p=0.003$ ( $z=3.02$ ) |
| $H_2S \rightarrow Flow$ | $p=0.73$ ( $z=0.35$ )   | $p=0.02$ ( $z=2.26$ )  | $p=0.06$ ( $z=1.92$ )  |
| $CO \rightarrow NO$     | $p=0.002$ ( $z=3.10$ )  | $p=0.81$ ( $z=0.25$ )  | $p=0.15$ ( $z=1.43$ )  |
| $NO \rightarrow Flow$   | $p=0.87$ ( $z=-0.16$ )  | $p=0.15$ ( $z=1.43$ )  | $p=0.23$ ( $z=1.19$ )  |
| $\chi^2$                | 0.27                    | 1.75                   | 1.75                   |
| RMSEA                   | 0.00 (0.00-0.32)        | 0.13 (0.00-0.43)       | 0.00 (0.00-0.26)       |

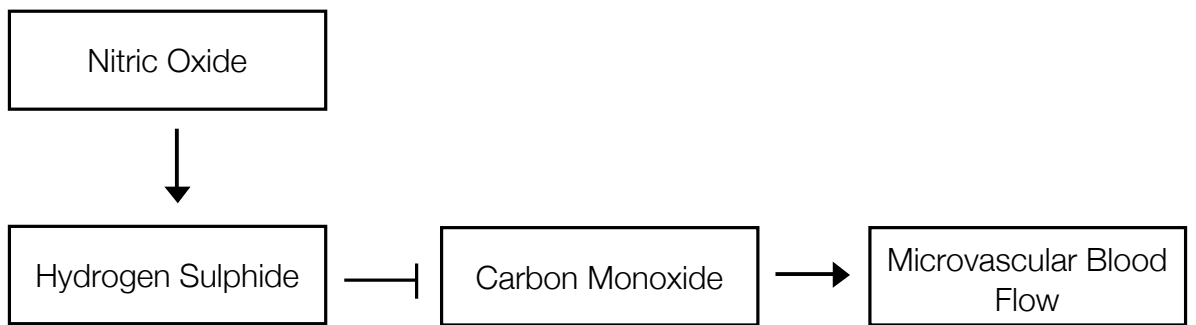

|                       | Female           | Male             | Overall          |
|-----------------------|------------------|------------------|------------------|
| NO → H <sub>2</sub> S | p=0.004 (z=2.91) | p=0.06 (z=1.87)  | p=0.005 (z=2.82) |
| H <sub>2</sub> S → CO | p=0.19 (z=-1.32) | p=0.87 (z=0.17)  | p=0.54 (z=-0.61) |
| CO → Flow             | p=0.83 (z=-0.21) | p=0.20 (z=1.29)  | p=0.51 (z=0.66)  |
| $\chi^2$              | 7.26             | 8.93             | 9.10             |
| RMSEA                 | 0.18 (0.00-0.36) | 0.21 (0.06-0.37) | 0.15 (0.04-0.27) |

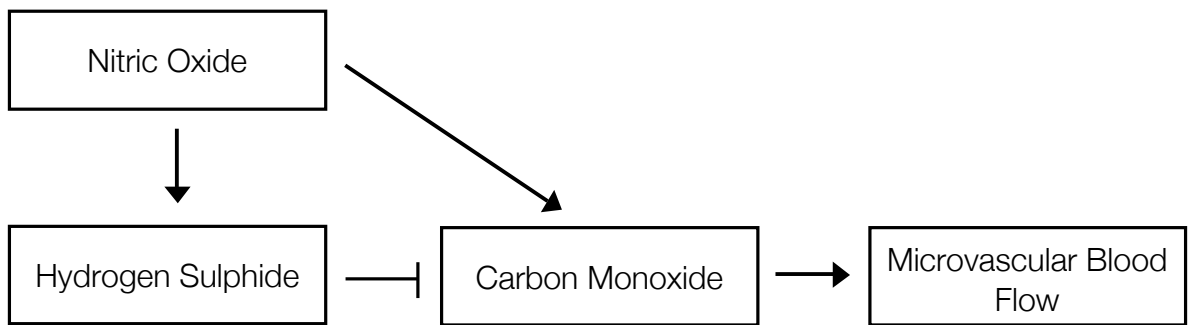

|                       | Female            | Male             | Overall          |
|-----------------------|-------------------|------------------|------------------|
| NO → H <sub>2</sub> S | p=0.004 (z=2.91)  | p=0.06 (z=1.87)  | p=0.004 (z=2.82) |
| NO → CO               | p=0.004 (z=2.86)  | p=0.83 (z=0.22)  | p=0.16 (z=1.40)  |
| H <sub>2</sub> S → CO | p=0.003 (z=-2.93) | p=0.94 (z=0.08)  | p=0.25 (z=-1.15) |
| CO → Flow             | p=0.55 (z=-0.60)  | p=0.02 (z=1.28)  | p=0.60 (z=0.53)  |
| $\chi^2$              | 0.04              | 8.08             | 7.19             |
| RMSEA                 | 0.00              | 0.27 (0.11-0.46) | 0.17 (0.05-0.31) |



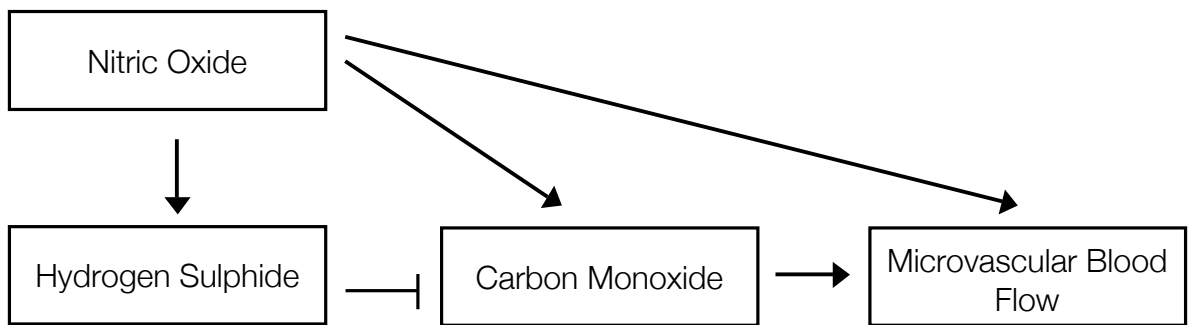

|                       | Female            | Male             | Overall          |
|-----------------------|-------------------|------------------|------------------|
| NO → H <sub>2</sub> S | p=0.004 (z=2.82)  | p=0.06 (z=1.87)  | p=0.005 (z=2.82) |
| NO → CO               | p=0.004 (z=2.86)  | p=0.88 (z=0.15)  | p=0.16 (z=1.39)  |
| NO → Flow             | p=0.97 (z=0.04)   | p=0.05 (z=1.98)  | p=0.09 (z=1.72)  |
| H <sub>2</sub> S → CO | p=0.003 (z=-2.93) | p=0.90 (z=0.12)  | p=0.23 (z=-1.20) |
| CO → Flow             | p=0.55 (z=-0.60)  | p=0.20 (z=1.28)  | p=0.74 (z=0.33)  |
| $\chi^2$              | 0.04              | 5.10             | 4.26             |
| RMSEA                 | 0.00 (0.00-0.23)  | 0.30 (0.09-0.57) | 0.19 (0.04-0.39) |

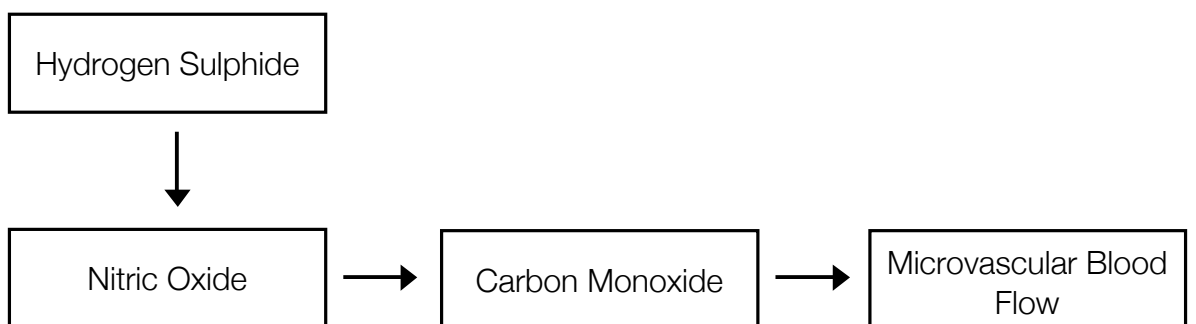

|                       | Female           | Male             | Overall          |
|-----------------------|------------------|------------------|------------------|
| $H_2S \rightarrow NO$ | p=0.004 (z=2.91) | p=0.06 (z=1.87)  | p=0.005 (z=2.82) |
| $NO \rightarrow CO$   | p=0.22 (z=1.22)  | p=0.79 (z=0.26)  | p=0.32 (z=1.00)  |
| $CO \rightarrow Flow$ | p=0.99 (z=-0.02) | p=0.19 (z=1.30)  | p=0.35 (z=0.94)  |
| $\chi^2$              | 7.48             | 8.89             | 8.49             |
| RMSEA                 | 0.19 (0.00-0.36) | 0.20 (0.06-0.37) | 0.14 (0.03-0.26) |

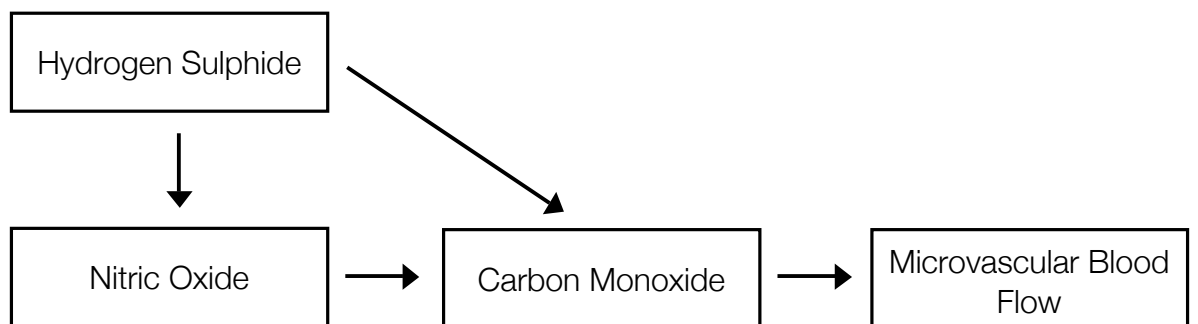

|                       | Female            | Male             | Overall          |
|-----------------------|-------------------|------------------|------------------|
| $H_2S \rightarrow NO$ | p=0.004 (z=2.91)  | p=0.06 (z=1.87)  | p=0.005 (z=2.82) |
| $H_2S \rightarrow CO$ | p=0.003 (z=-2.93) | p=0.94 (z=0.08)  | p=0.25 (z=-1.15) |
| $NO \rightarrow CO$   | p=0.004 (z=2.86)  | p=0.83 (z=0.22)  | p=0.16 (z=1.40)  |
| $CO \rightarrow Flow$ | p=0.55 (z=-0.60)  | p=0.20 (z=1.28)  | p=0.60 (z=0.53)  |
| $\chi^2$              | 0.04              | 8.88             | 7.19             |
| RMSEA                 | 0.00              | 0.27 (0.11-0.46) | 0.17 (0.05-0.31) |

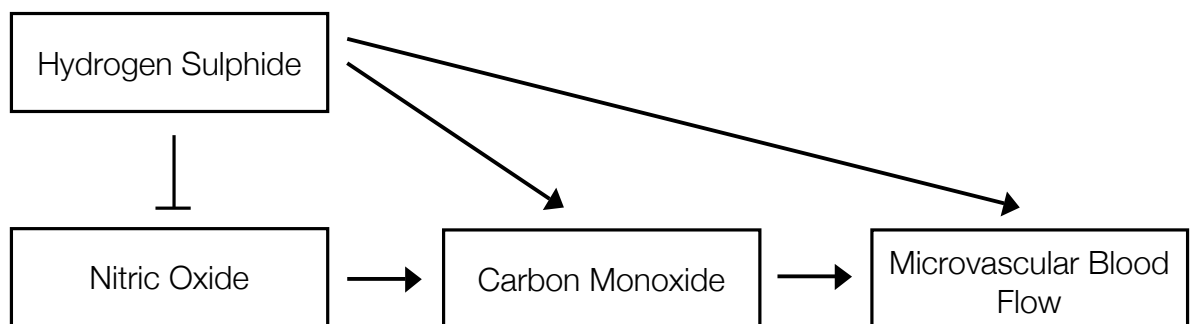

|                         | Female            | Male             | Overall          |
|-------------------------|-------------------|------------------|------------------|
| $H_2S \rightarrow NO$   | p=0.005 (z=2.91)  | p=0.06 (z=1.87)  | p=0.005 (z=2.82) |
| $H_2S \rightarrow CO$   | p=0.004 (z=-2.91) | p=0.84 (z=-0.20) | p=0.19 (z=-1.31) |
| $H_2S \rightarrow Flow$ | p=0.91 (z=-0.12)  | p=0.006 (z=2.74) | p=0.01 (z=2.52)  |
| $NO \rightarrow CO$     | p=0.004 (z=2.86)  | p=0.74 (z=0.34)  | p=0.15 (z=1.46)  |
| $CO \rightarrow Flow$   | p=0.60 (z=-0.52)  | p=0.16 (z=1.40)  | p=0.28 (z=1.08)  |
| $\chi^2$                | 0.03              | 1.88             | 1.02             |
| RMSEA                   | 0.00 (0.00-0.21)  | 0.14 (0.00-0.44) | 0.02 (0.00-0.28) |
